# Supplementary material
Source: publisher site journal article supplement (https://www.spandidos-publications.com/4725/downloadSupplementary)

Figure S1. Effect of Sam68 knockdown on vimentin mRNA expression. RT-qPCR analysis of relative mRNA expression normalized to  $\beta$ -actin between the cells transfected with control siRNA (control) or Sam68 siRNA (Sam68 #1 or #2) in (A) HSC-2, (B) HSC-3, and (C) HOC313. All data are expressed as the mean  $\pm$  SD. Dunnett's test compared with the control. \* $P$ <0.01 and \*\* $P$ <0.05. Sam68, Src-associated in mitosis 68 kDa; ns, not significant.

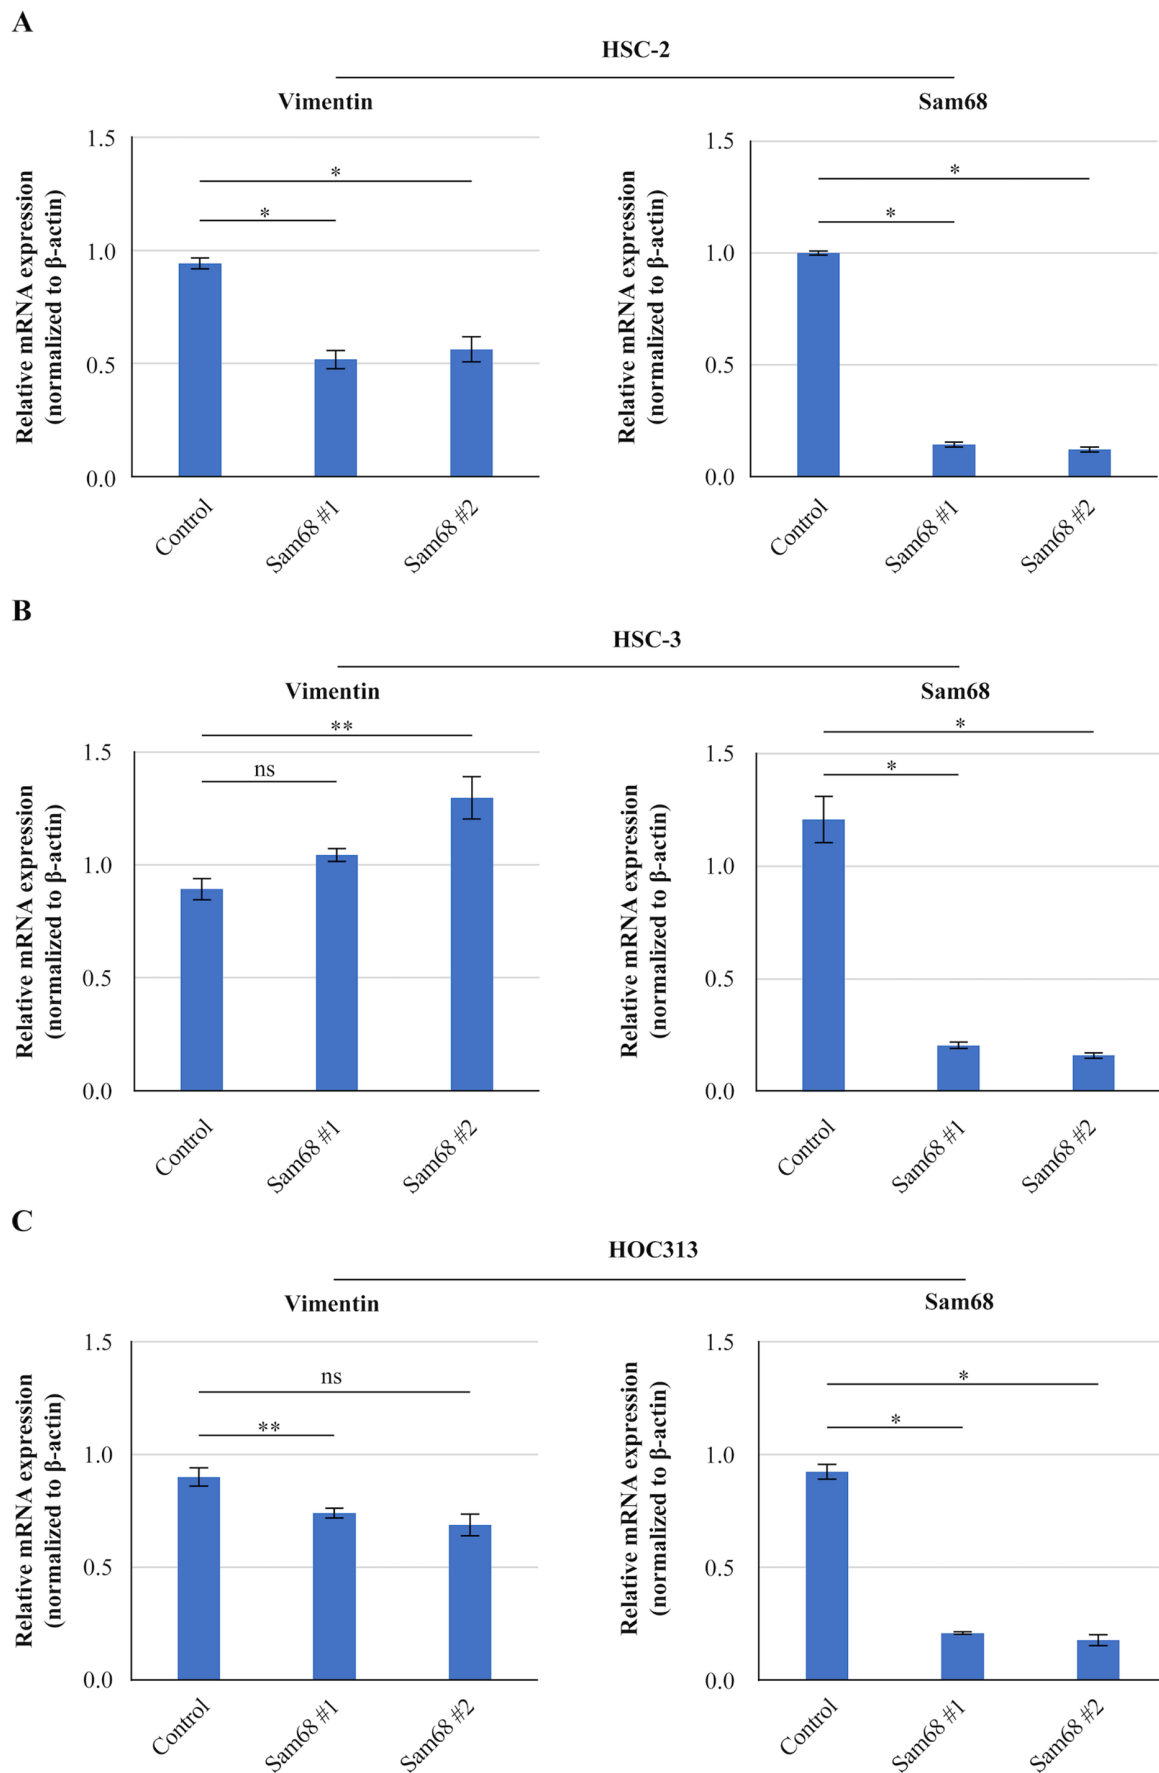

Supplement: Supplementary file 1 [file downloadSupplementary]
